# Supplementary material
Source: publisher figshare collection journal article supplement (https://asha.figshare.com/articles/dataset/_/27115252)
Supplement: Supplementary file 2 [file 1]

# Dyad A

● In-person ○ Telehealth

Baseline Matched Turns Expansions Time Delays Milieu Teaching Maintenance

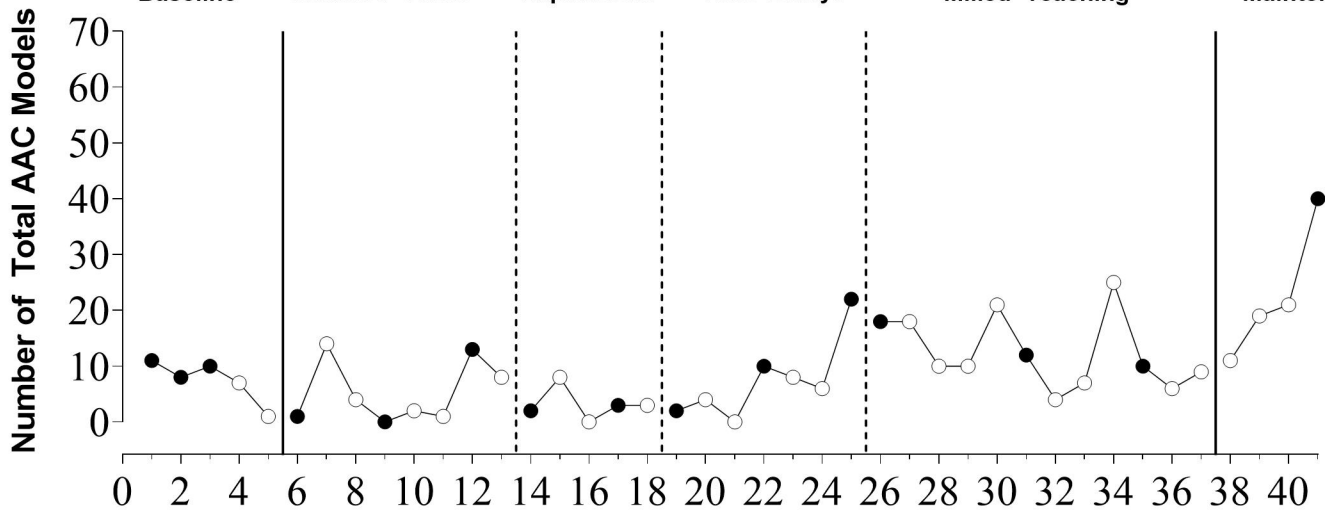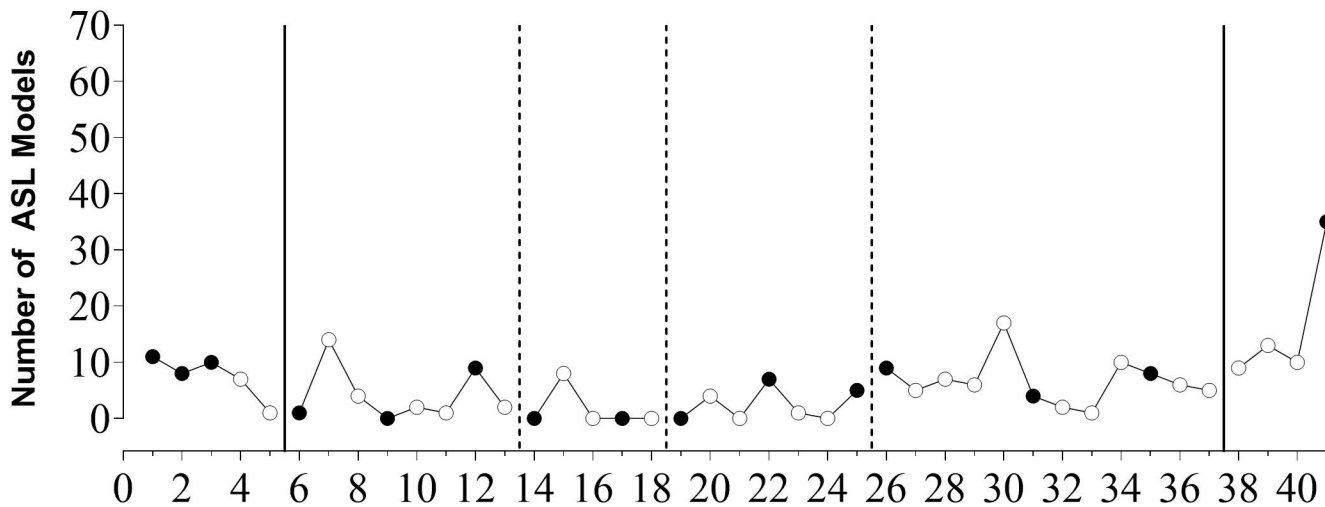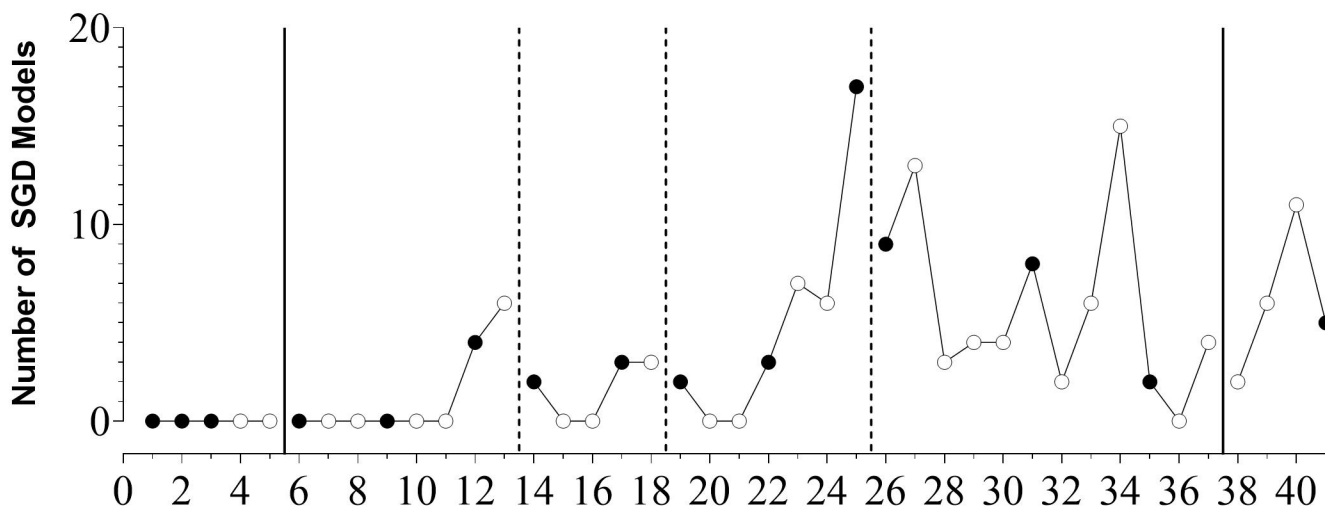

Note. During Tier 2 Expansions, caregivers received focused instruction on using the SGD

Days

# Dyad B

● In-person ○ Telehealth

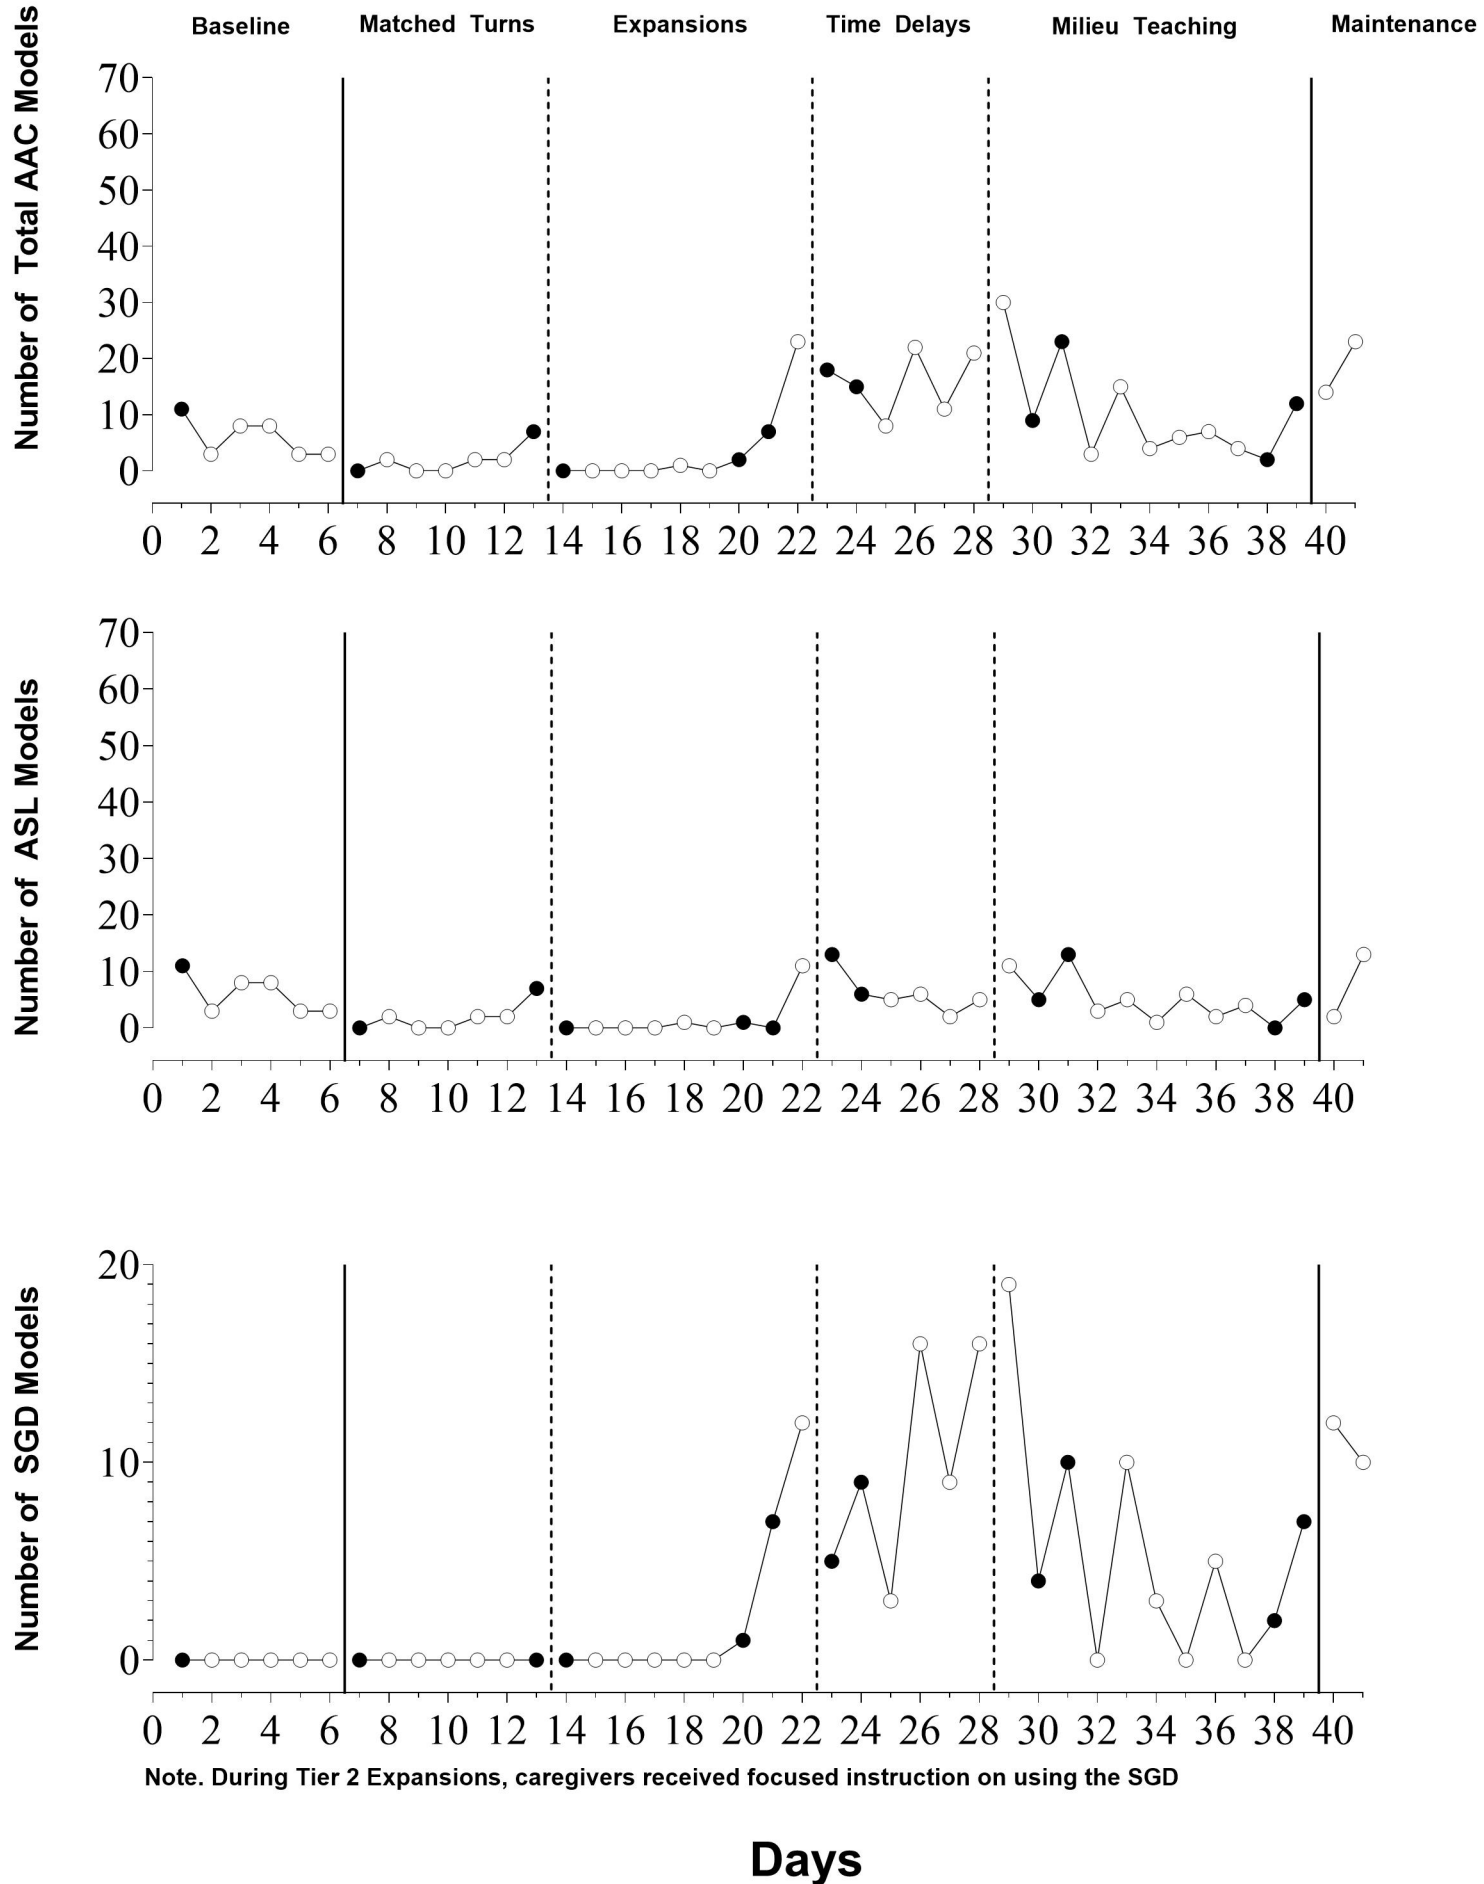

# Dyad C

● In-person ○ Telehealth

Baseline Matched Turns Expansions Time Delays Milieu Teaching Maintenance

Number of Total AAC Models

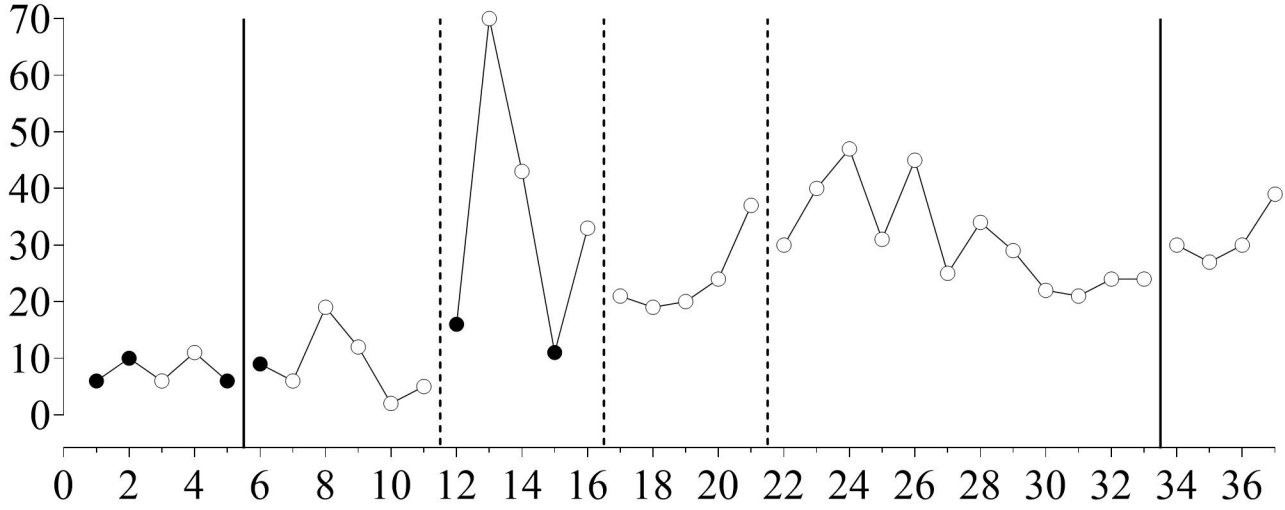

Number of ASL Models

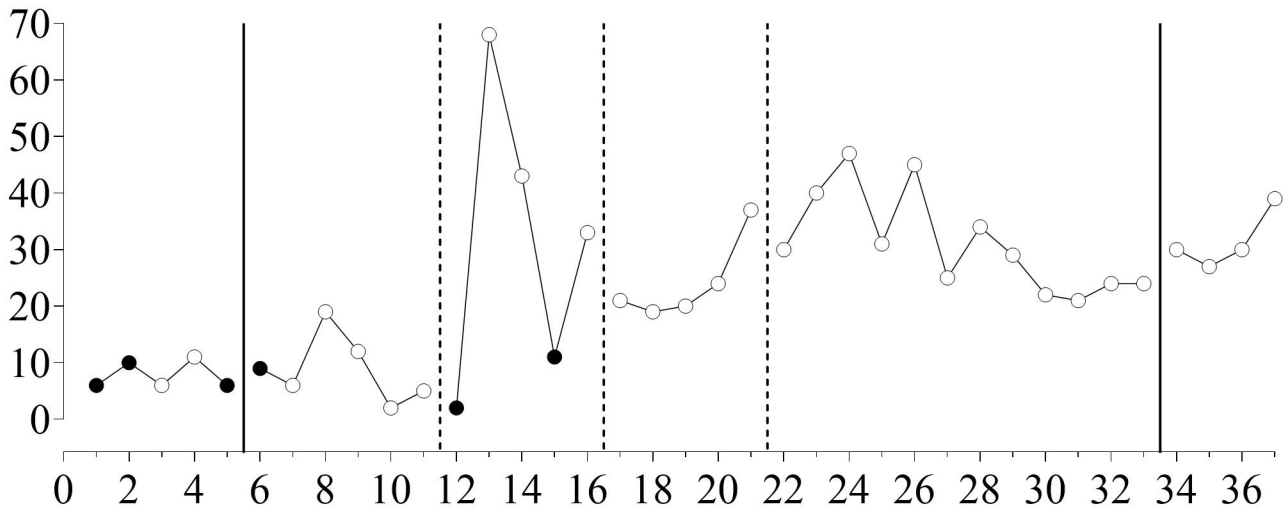

Number of SGD Models

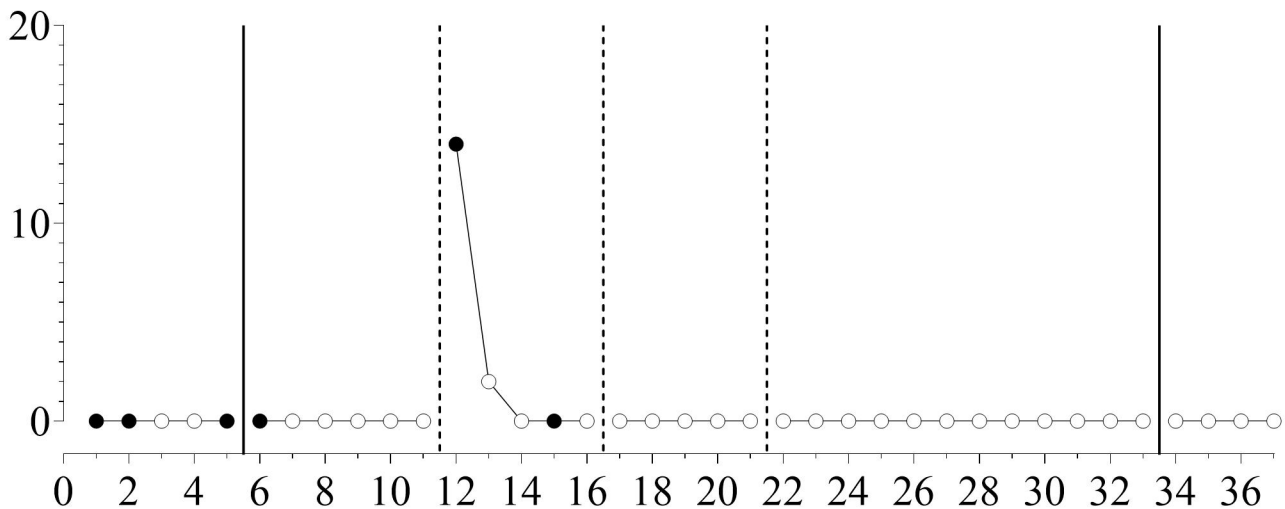

Note. During Tier 2 Expansions, caregivers received focused instruction on using the SGD

Days
