# Supplementary material
Source: publisher figshare collection journal article supplement (https://asha.figshare.com/articles/dataset/_/27115252)
Supplement: Supplementary file 3 [file 1]

# **Supplemental Material S4. Child communication outcomes across conditions.**

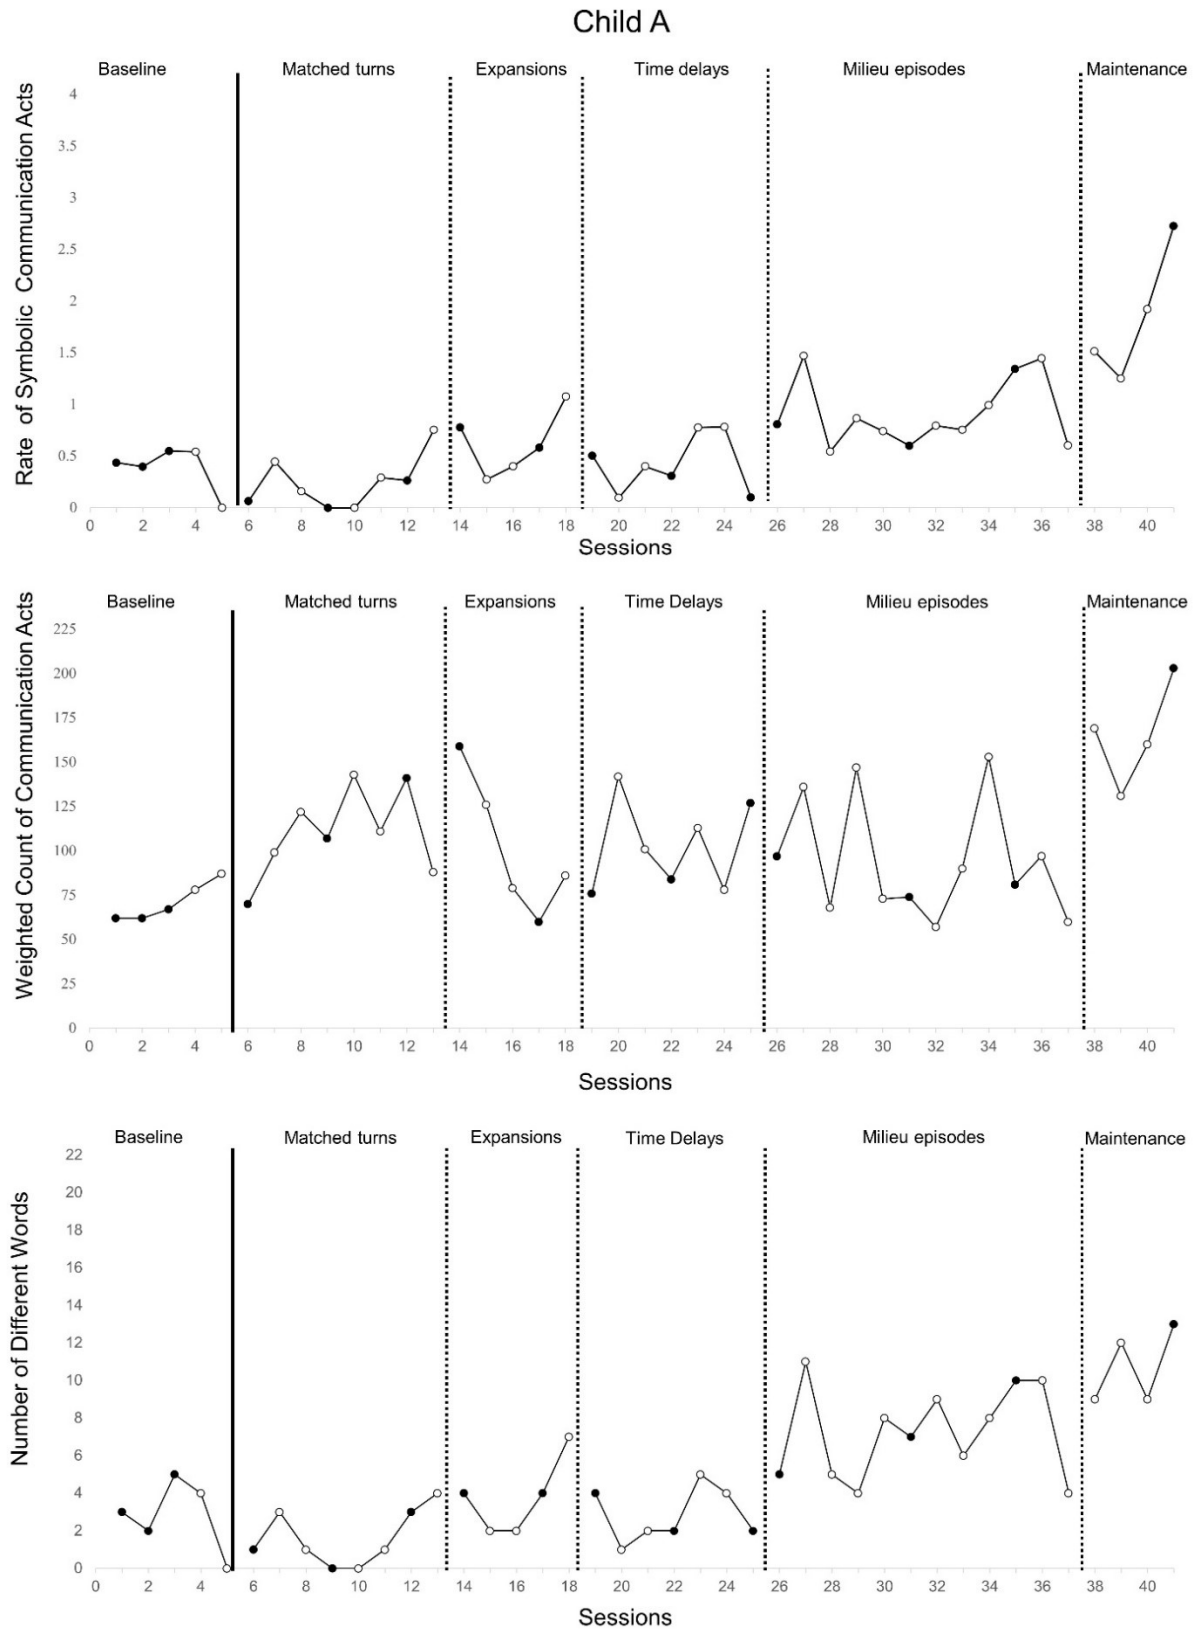

Child B

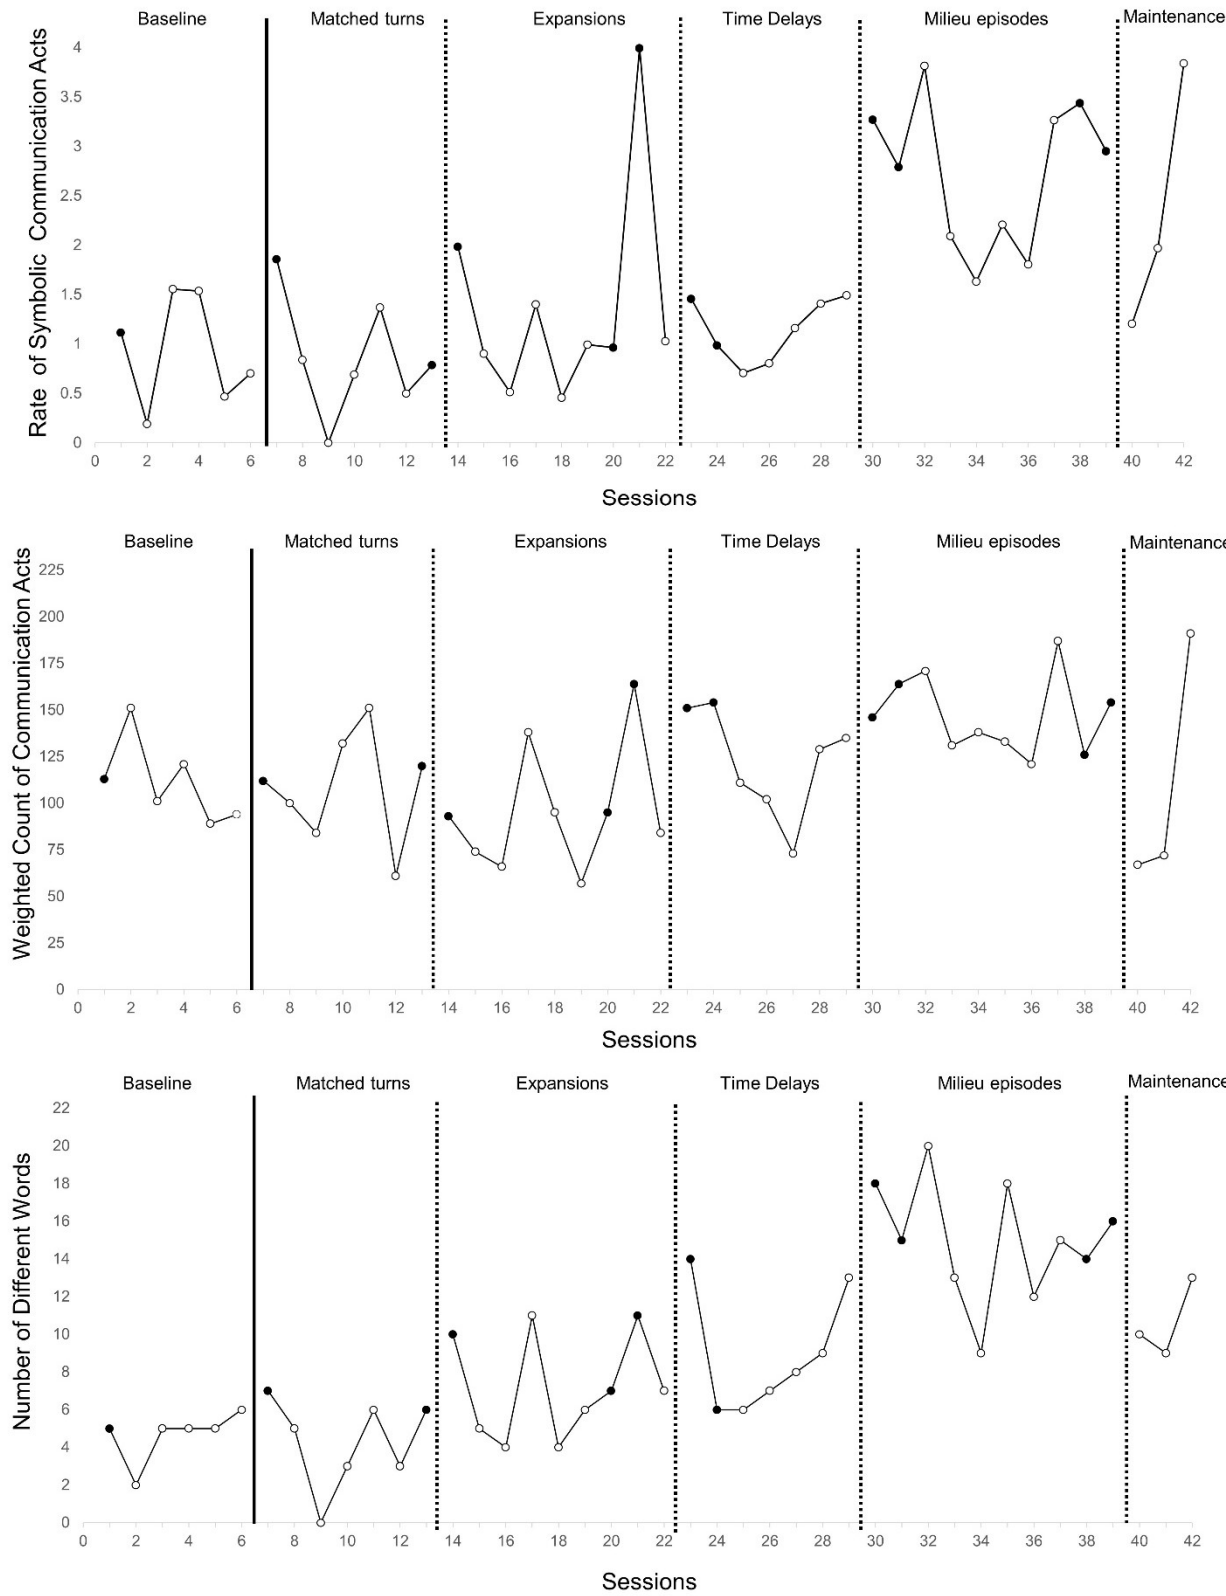

### Child C

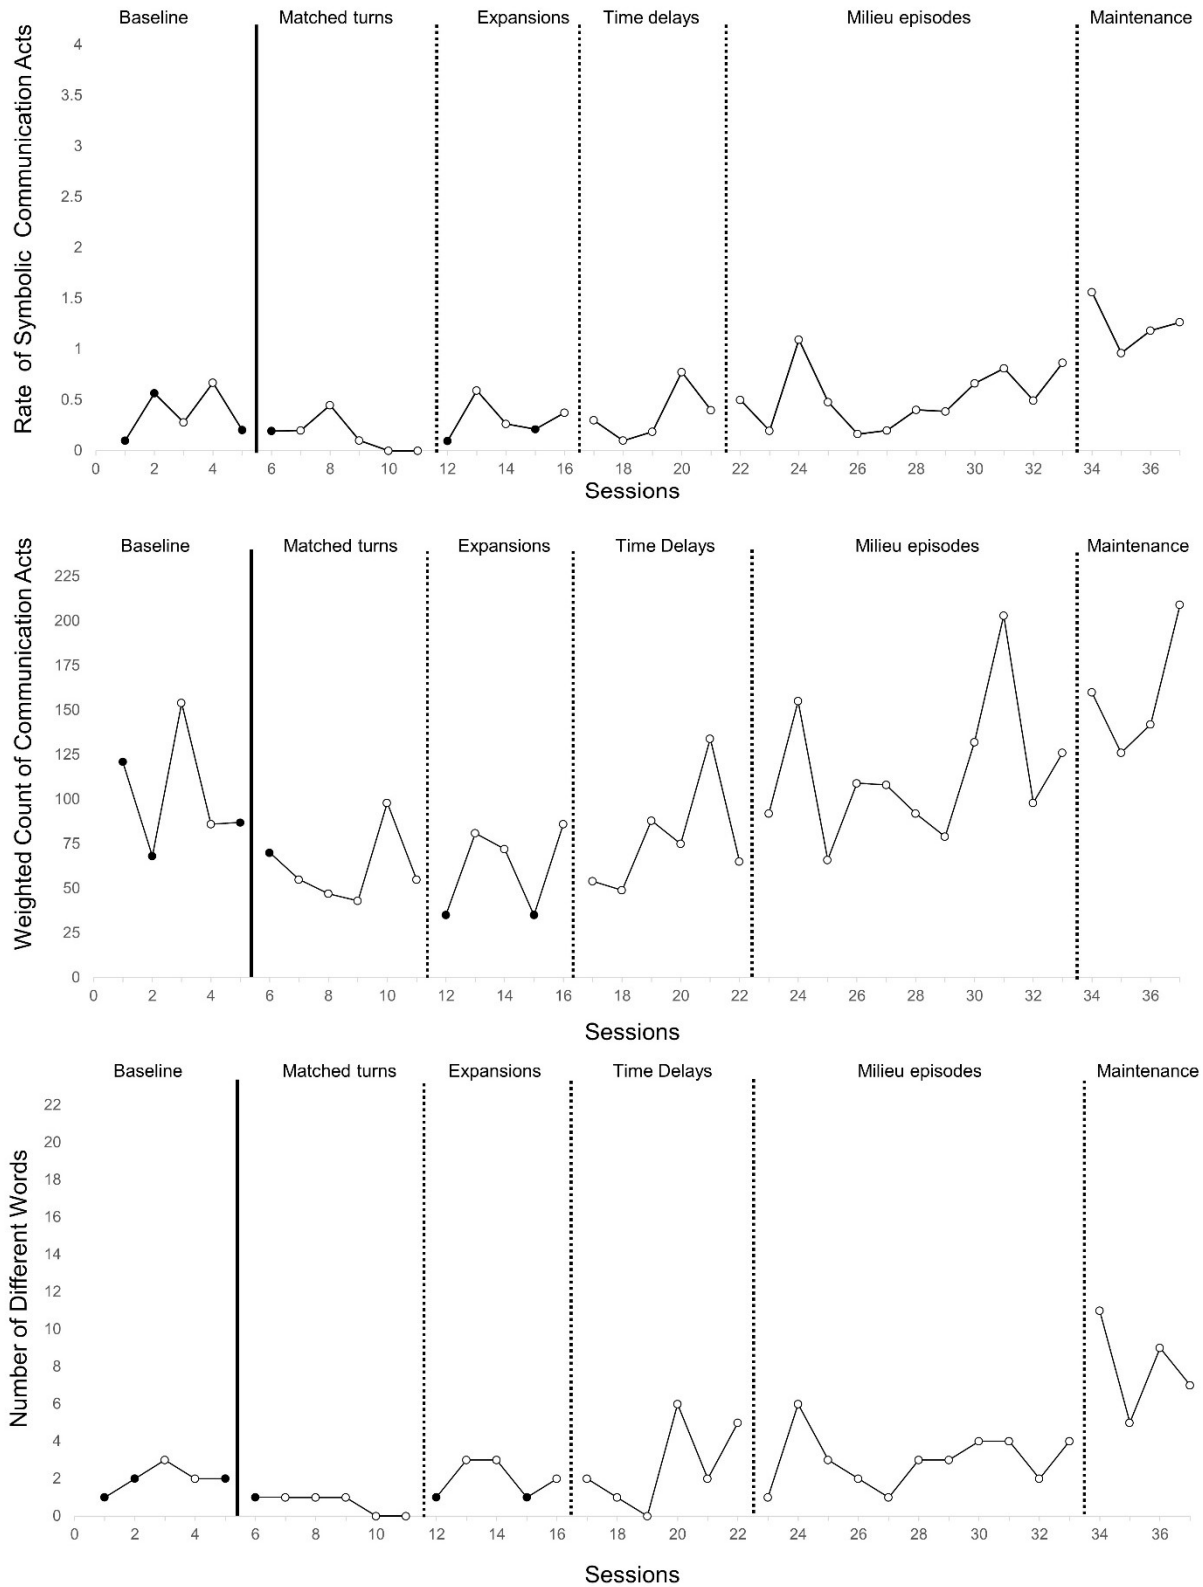

**Note.** Condition changes from baseline to intervention and maintenance were concurrent for caregivers and their children.
