# Supplementary material
Source: publisher figshare collection journal article supplement (https://asha.figshare.com/articles/dataset/_/27115252)
Supplement: Supplementary file 4 [file 1]

## Supplemental Material S2. Child developmental skills.

| Measures                          | Child A      | Child B      | Child C      |
|-----------------------------------|--------------|--------------|--------------|
| Preschool Language Scales (PLS-5) | SS           | SS           | SS           |
| Auditory Comprehension            | 50           | 84           | 62           |
| Expressive Communication          | 52           | 91           | 63           |
| Total Score                       | 50           | 86           | 60           |
| Mullen Scales of Early Learning   | <i>T</i>     | <i>T</i>     | <i>T</i>     |
| Visual Reception                  | 20           | 35           | 20           |
| Fine Motor                        | 20           | 37           | 20           |
| Receptive Language                | 20           | 39           | 20           |
| Expressive Language               | 20           | 42           | 20           |
| Early Learning Composite          | SS           | SS           | SS           |
|                                   | 50           | 77           | 50           |
| MacArthur Bates CDI               |              |              |              |
| Total Words Understood            | 40           | 233          | 41           |
| Total Words Produced <sup>1</sup> | 24           | 81           | 4            |
| Total Verbs Understood            | 5            | 39           | 13           |
| Total Verbs Produced              | 5            | 21           | 1            |
| Language Sample                   |              |              |              |
| Rate of Communication Acts        | 6.32         | 9.38         | 11.67        |
| Rate of Symbolic Communication    | 0.44         | 1.11         | 0.10         |
| Number of Different Words         | 3            | 5            | 1            |
| Child Behavioral Checklist (CBCL) | <i>T</i>     | <i>T</i>     | <i>T</i>     |
| Internalizing Behavior            | 58           | 29           | 45           |
| Externalizing Behavior            | 65           | 28           | 47           |
| Total Problem Behavior            | 63           | 28           | 45           |
| Structured Play Assessment        |              |              |              |
| Most Frequent Play Level          | Combinations | Combinations | Combinations |
| Highest Play Level                | Pre-Symbolic | Pre-Symbolic | Combinations |

*Note.* SS= Standard Score with a mean of 100 and standard deviation of 15. For the Mullen, T=

T Scores have a mean of 50 and a standard deviation of 10. For the CBCL, T scores of less than 60 are considered typical and are within age expectations. CI = Confidence interval.

<sup>1</sup> Includes words expressed in American Sign Language.
